# Supplementary material for: Dryfilm-ATR-FTIR analysis of urinary profiles as a point-of-care tool to evaluate aerobic exercise
Source: Royal Society of Chemistry journal article supplement (doi:10.1039/d4ay00913d), 2024-01-01
Supplement: d4ay00913d1.pdf [file d4ay00913d1.pdf]

## Supplementary Material to

### Dryfilm-ATR-FTIR analysis of urinary profiles as a point-of-care tool to evaluate aerobic exercise

Jaume Béjar Grimalt<sup>1</sup>, Ángel Sánchez-Illana<sup>1\*</sup>, Miguel de la Guardia<sup>1</sup>, Salvador Garrigues<sup>1</sup>, Ignacio Catalá-Vilaplana<sup>2</sup>, Jose Luis Bermejo-Ruiz<sup>3</sup>, Jose Ignacio Priego-Quesada<sup>2,4\*</sup>, David Pérez-Guaita<sup>1</sup>

<sup>1</sup>Department of Analytical Chemistry, University of Valencia, Burjassot, Spain

<sup>2</sup>Research Group in Sports Biomechanics (GIBD), Department of Physical Education and Sports, Universitat de València, Valencia, Spain.

<sup>3</sup>Department of Physical Education and Sports, Universitat de València, Valencia, Spain.

<sup>4</sup>Research Group in Medical Physics (GIFIME), Department of Physiology, Universitat de València, Valencia, Spain.

\* Corresponding authors: [angel.illana@uv.es](mailto:angel.illana@uv.es), [j.ignacio.priego@uv.es](mailto:j.ignacio.priego@uv.es)

**Supplementary Table S1.** Number of samples (N) of each time for the dry-film ATR analysis of urine samples.

|                | Pre<br>(t = -2 h) | Post<br>(t = 0 h) | Post2<br>(t = 2 h) | Post5<br>(t = 5 h) | Post11<br>(t = 11 h) | Post24<br>(t = 24 h) |
|----------------|-------------------|-------------------|--------------------|--------------------|----------------------|----------------------|
| N Experimental | 14                | 14                | 13                 | 14                 | 14                   | 14                   |
| N Control      | -                 | 4                 | 7                  | 4                  | 5                    | 7                    |

**Supplementary Table S2.** Number of samples (N) of each time for the dry-film ATR analysis of urinary proteins.

|                | Pre<br>(t = -2 h) | Post<br>(t = 0 h) | Post2<br>(t = 2 h) | Post5<br>(t = 5 h) | Post11<br>(t = 11 h) | Post24<br>(t = 24 h) |
|----------------|-------------------|-------------------|--------------------|--------------------|----------------------|----------------------|
| N Experimental | 5                 | 9                 | 11                 | 9                  | 10                   | 12                   |

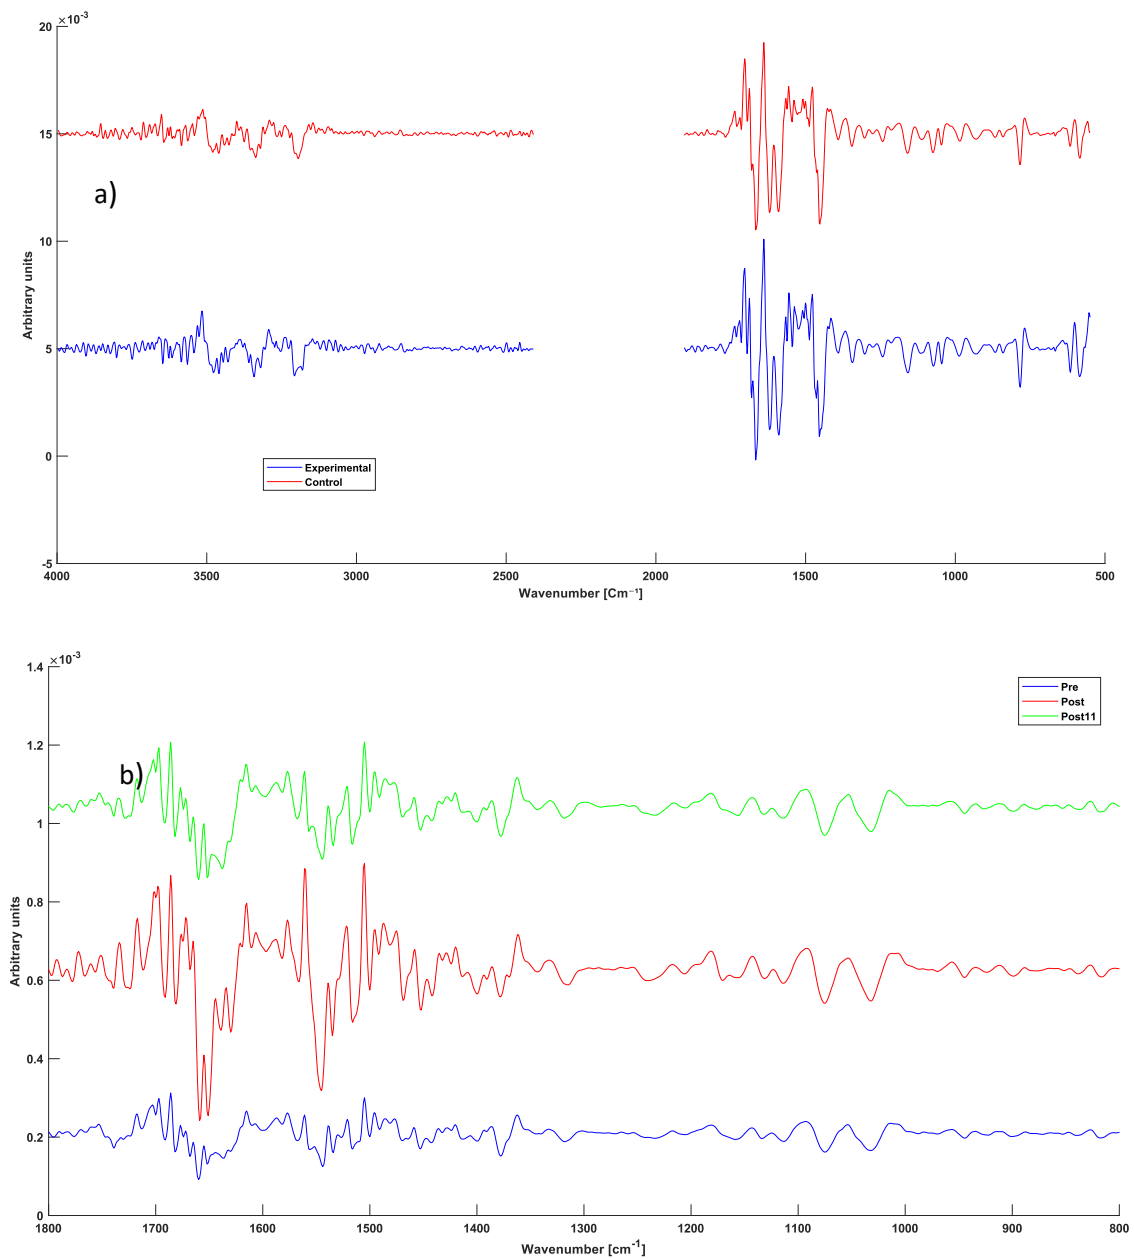

**Figure SM1.** a). Average second derivative IR spectra (lines) and standard deviation (shade) of the urine dry-films. b) Average Second derivative spectra from the protein extracts. Spectra have been shifted along the Y-axis in order to provide a better comparison.

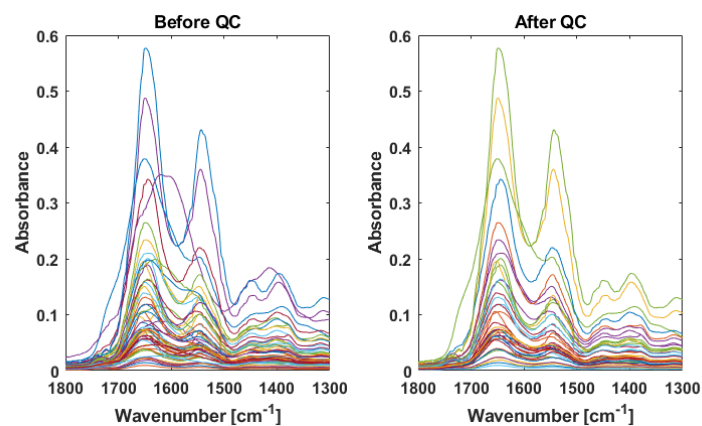

**Figure SM2.** Amide I and amide II bands in the IR spectra of protein extracts before and after the removal of samples with non-clear amide bands.

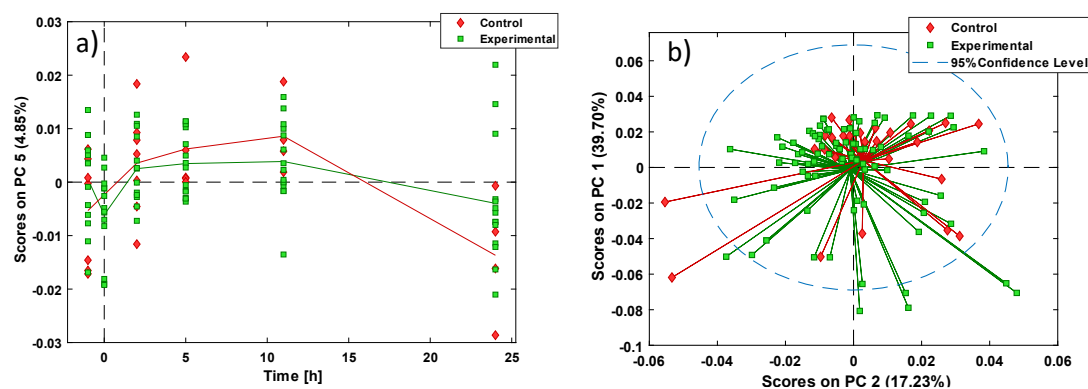

**Figure SM3.** Principal component analysis score plots of the urine dry films. a) PC5 vs. sampling time with a line connecting the mean score value for each time, b) PC1 vs. PC2.

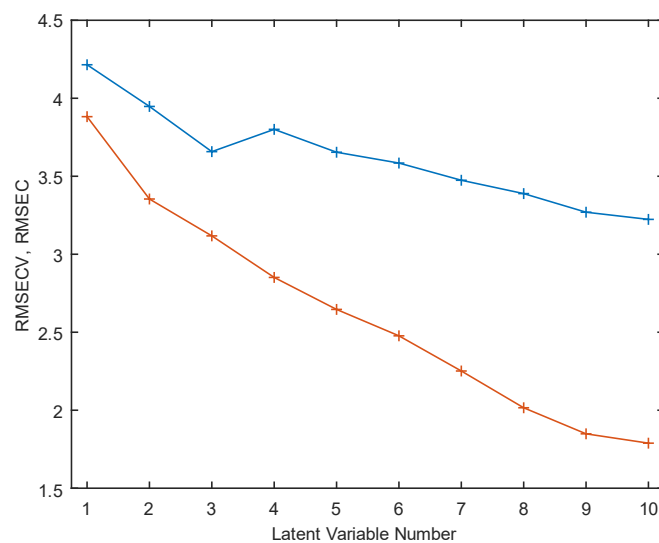

**Figure SM4.** RMSECV for the o-PLS using the samples from training group.

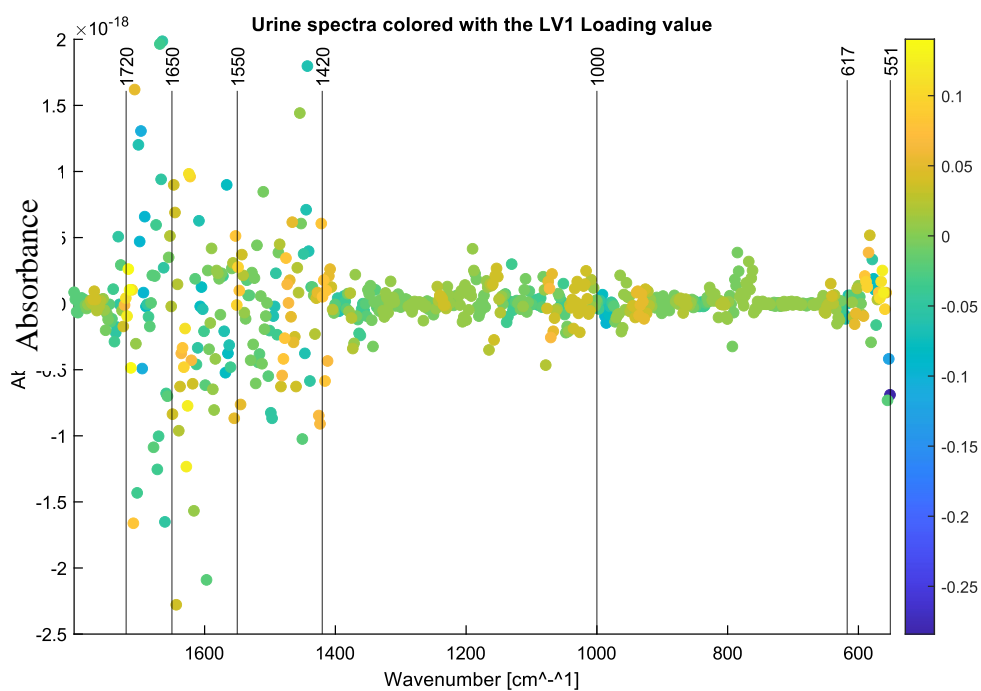

**Figure SM5.** Average spectrum of the dry films of urine after the second derivative. The color scale of the points indicates the values of the “component loading” (LV1 in the o-PLS).

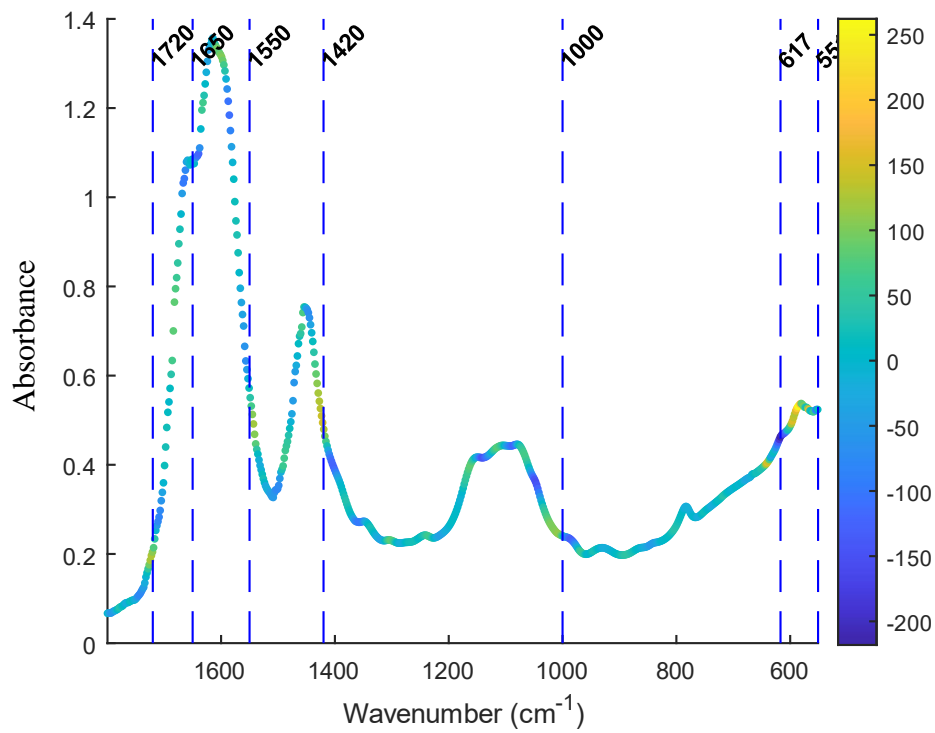

**Figure SM6.** Average spectrum of the dry film urine coloured with the o-PLS regression vector values.

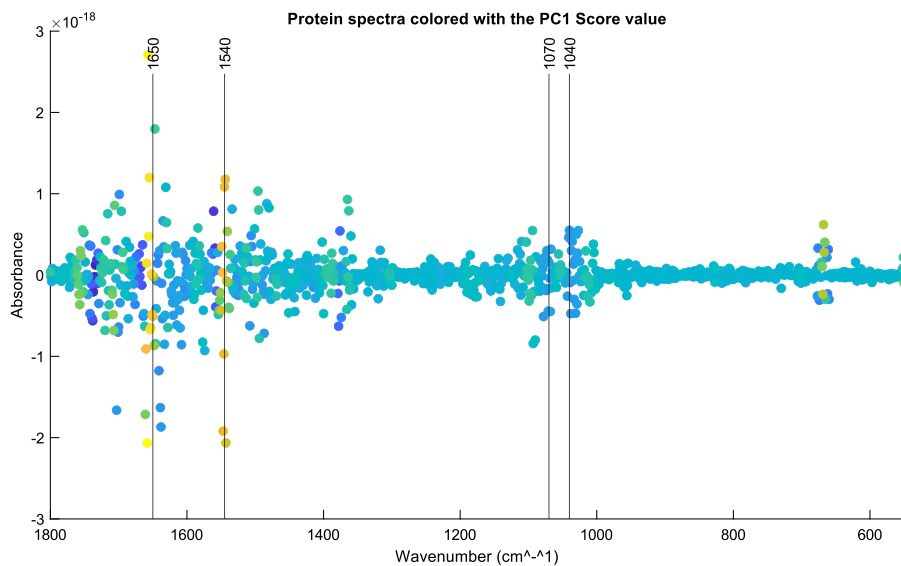

**Figure SM7.** Average spectrum of the protean extracts after the second derivative. The color scale of the points represents the values of the PC1 loading.
